# Supplementary material for: Human papillomaviruses and breast cancer: A systematic review and meta‑analysis
Source: PubMed Central journal article supplement — Oncol Lett. 2023 Dec 22;27(2):75. doi: 10.3892/ol.2023.14208 (PMC10773228; doi:10.3892/ol.2023.14208), 2023-12-22

**Data S1. Electronic database search strings.**

*PubMed:* (((((((HPV[tiab] AND (breast cancer[tiab])) OR ((HPV[tiab] AND (breast carcinoma[tiab]))) OR ((HPV[tiab] AND (mammary carcinoma[tiab]))) OR ((human papillomavirus\*[tiab] AND (breast cancer[tiab])) OR ((human papillomavirus\*[tiab] AND (breast carcinoma[tiab])) OR ('human papillomavirus\*[Title/Abstract] AND 'mammary carcinoma'[Title/Abstract])) OR ('human papillomavirus\*[Title/Abstract] AND 'mammary carcinoma'[Title/Abstract])))

*SCOPUS:* ( ( TITLE-ABS-KEY ( hpv ) AND TITLE-ABS-KEY (breast AND cancer)) AND PUBYEAR

>2002) AND ((TITLE-ABS-KEY (hpv) AND TITLE-ABS-KEY (breast AND carcinoma)) AND PUBYEAR>2002) AND ((TITLE-ABS-KEY (hpv) AND TITLE-ABS-KEY (mammary AND carcinoma)) AND PUBYEAR>2002) AND ((TITLE-ABS-KEY (human AND papillomavirus) AND TITLE-ABS-KEY (breast AND cancer)) AND PUBYEAR > 2002 ) AND ((TITLE-ABS-KEY (human AND papillomavirus) AND TITLE-ABS-KEY (breast AND carcinoma)) AND PUBYEAR >2002) AND ((TITLE-ABS-KEY (human AND papillomavirus) AND TITLE-ABS-KEY (mammary AND carcinoma)) AND PUBYEAR >2002) AND (LIMIT-TO (DOCTYPE, «ar»)) AND (LIMIT-TO (PUBSTAGE, «final»)) AND (LIMIT-TO (SRCTYPE, «j»)) AND (LIMIT-TO (LANGUAGE, «English»))

Figure S1. Preferred reporting items for systematic reviews and meta-analysis flowchart. HPV, human papillomavirus; PCR, polymerase chain reaction.

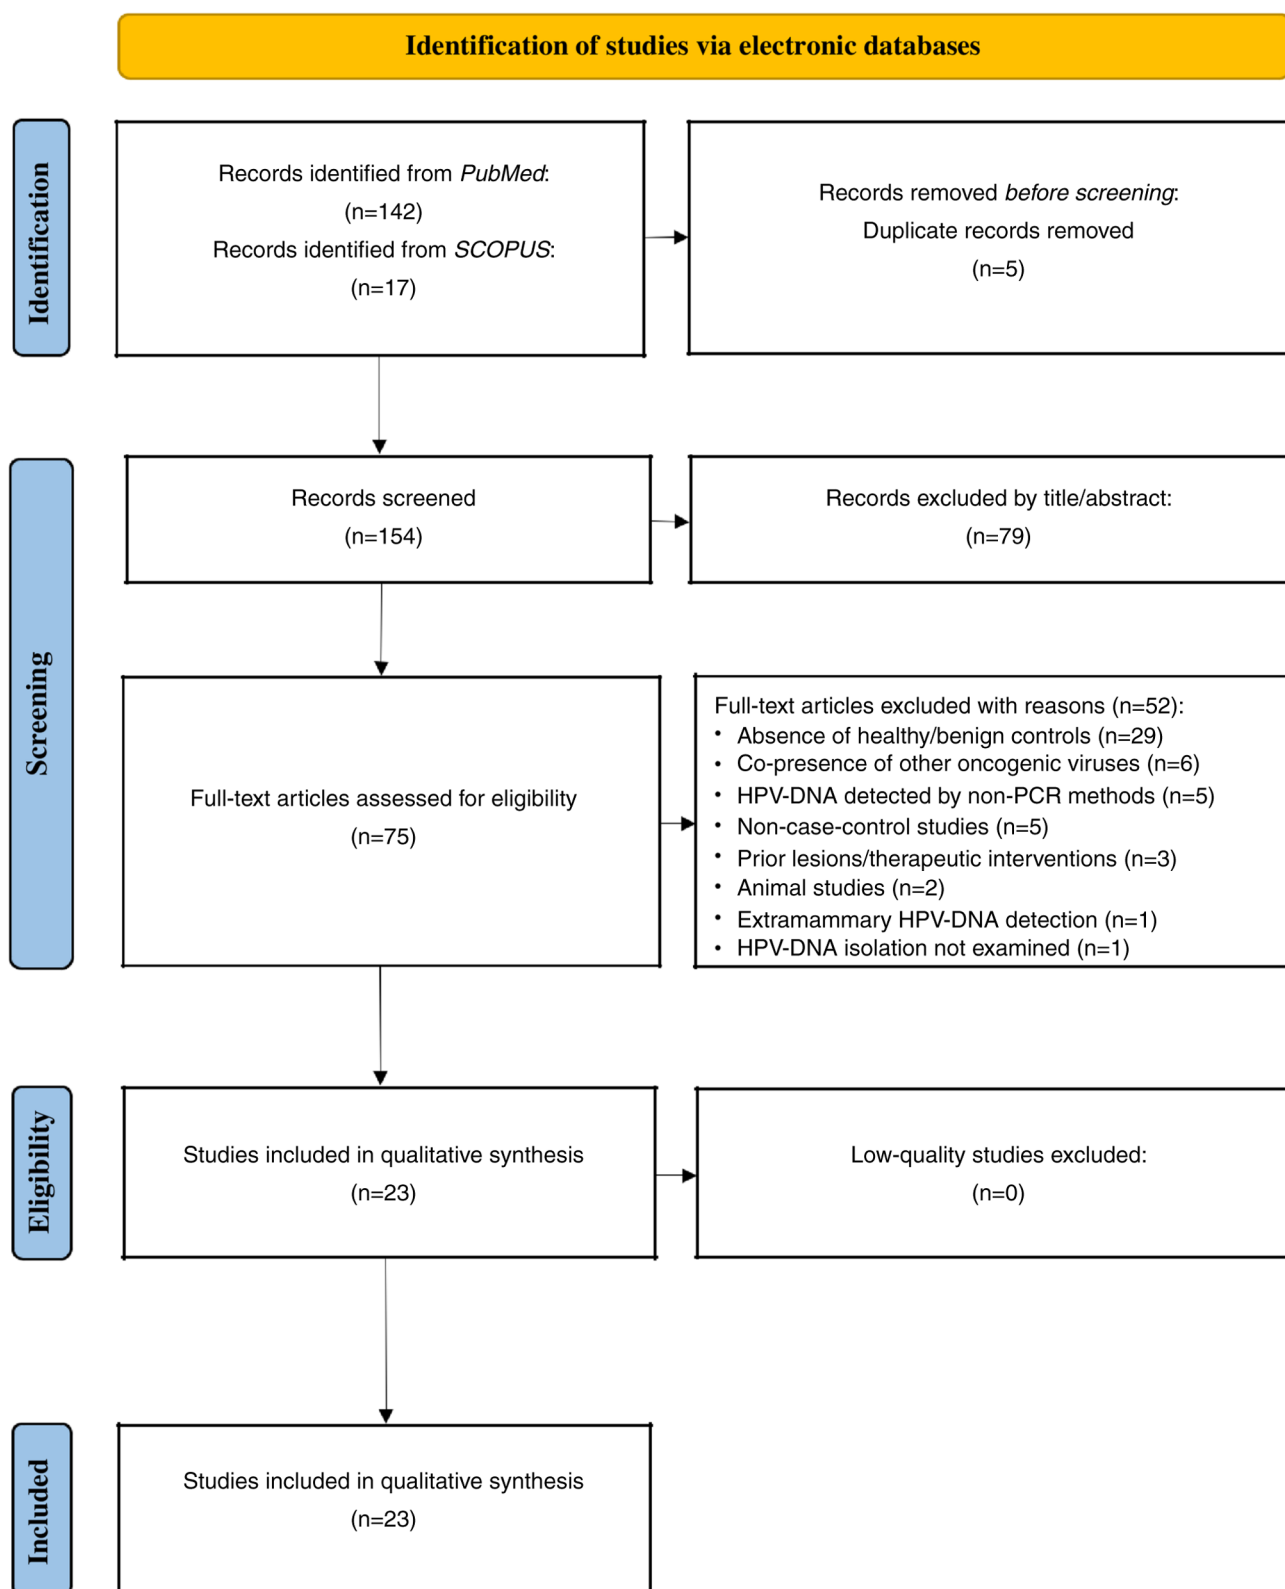

Figure S2. Forest plot.

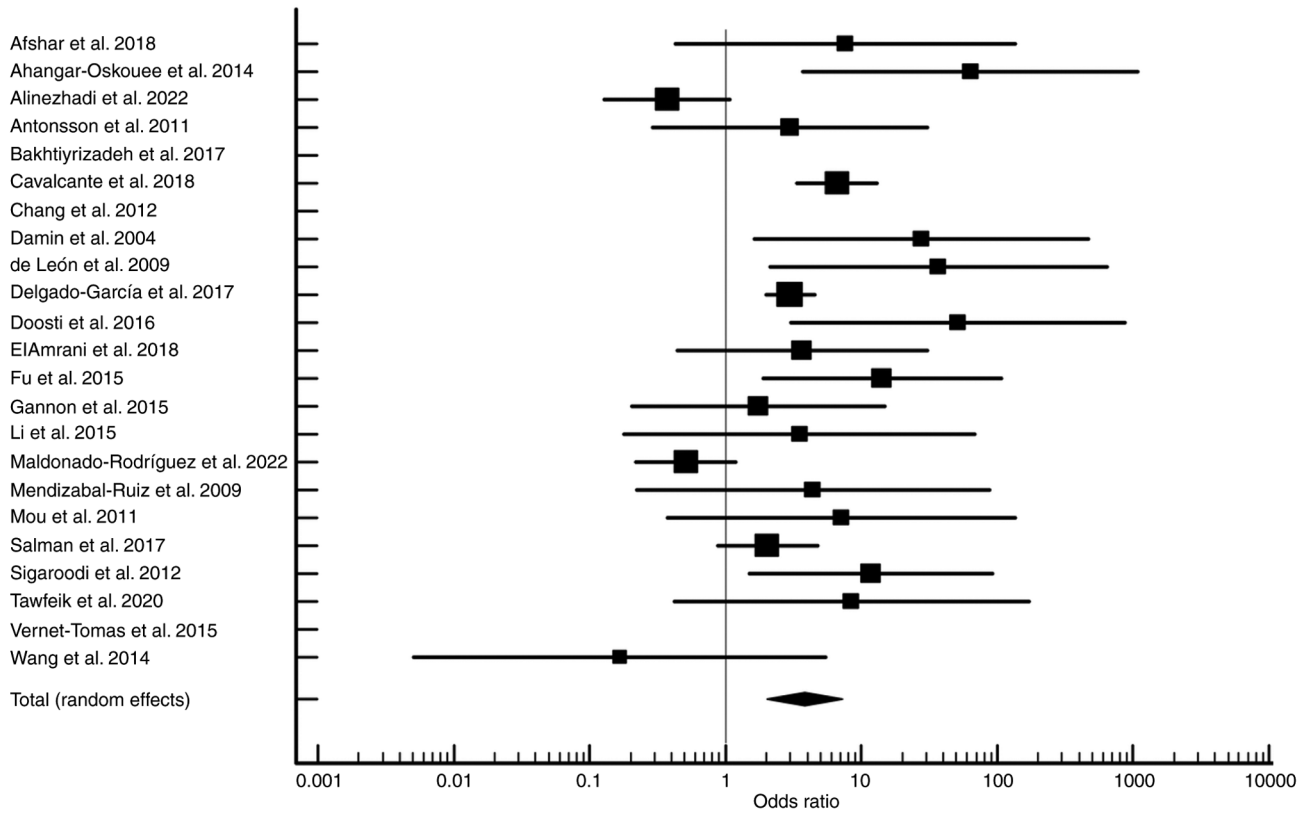

Supplement: Supplementary_Data1.pdf [file Supplementary_Data1.pdf]
