# Supplementary material for: Human papillomaviruses and breast cancer: A systematic review and meta‑analysis
Source: PubMed Central journal article supplement — Oncol Lett. 2023 Dec 22;27(2):75. doi: 10.3892/ol.2023.14208 (PMC10773228; doi:10.3892/ol.2023.14208), 2023-12-22
Supplement: Supplementary_Data2.pdf [file Supplementary_Data2.pdf]

Table SI. CASP case control study checklist.

| First author(s), year                   | CASP criteria |    |     |              |   |    |              |              |    |              |    | Score | Quality classification | References |
|-----------------------------------------|---------------|----|-----|--------------|---|----|--------------|--------------|----|--------------|----|-------|------------------------|------------|
|                                         | i             | ii | iii | iv           | v | vi | vii          | viii         | ix | x            | xi |       |                        |            |
| Afshar <i>et al</i> , 2018              | Y             | Y  | N   | Y            | Y | N  | N            | N            | Y  | <sup>a</sup> | Y  | 6     | Moderate               | (74)       |
| Ahangar-Oskouee <i>et al</i> , 2014     | Y             | Y  | N   | N            | Y | N  | Y            | N            | Y  | <sup>a</sup> | Y  | 6     | Moderate               | (75)       |
| Alinezhadi <i>et al</i> , 2022          | Y             | Y  | N   | N            | Y | N  | Y            | <sup>a</sup> | Y  | N            | Y  | 6     | Moderate               | (7)        |
| Antonsson <i>et al</i> , 2011           | Y             | Y  | N   | Y            | Y | N  | Y            | Y            | Y  | <sup>a</sup> | Y  | 8     | High                   | (76)       |
| Bakhtyrizadeh <i>et al</i> , 2017       | Y             | Y  | Y   | Y            | Y | Y  | Y            | Y            | Y  | <sup>a</sup> | Y  | 10    | High                   | (77)       |
| Cavalcante <i>et al</i> , 2018          | Y             | Y  | Y   | Y            | Y | Y  | Y            | Y            | Y  | <sup>a</sup> | Y  | 10    | High                   | (78)       |
| Chang <i>et al</i> , 2012               | Y             | Y  | Y   | Y            | Y | Y  | Y            | Y            | Y  | <sup>a</sup> | Y  | 10    | High                   | (79)       |
| Damin <i>et al</i> , 2004               | Y             | Y  | Y   | Y            | Y | Y  | Y            | Y            | Y  | <sup>a</sup> | Y  | 10    | High                   | (80)       |
| de León <i>et al</i> , 2009             | Y             | Y  | Y   | Y            | Y | Y  | Y            | Y            | Y  | <sup>a</sup> | Y  | 10    | High                   | (81)       |
| Delgado-García <i>et al</i> , 2017      | Y             | Y  | Y   | Y            | Y | Y  | Y            | Y            | Y  | Y            | Y  | 11    | High                   | (21)       |
| Doosti <i>et al</i> , 2016              | Y             | Y  | Y   | <sup>a</sup> | Y | Y  | Y            | Y            | Y  | Y            | Y  | 10    | High                   | (82)       |
| ElAmrani <i>et al</i> , 2018            | Y             | Y  | Y   | <sup>a</sup> | Y | Y  | Y            | N            | Y  | <sup>a</sup> | Y  | 8     | High                   | (83)       |
| Fu <i>et al</i> , 2015                  | Y             | Y  | Y   | Y            | Y | N  | Y            | Y            | Y  | N            | Y  | 9     | High                   | (84)       |
| Gannon <i>et al</i> , 2015              | Y             | Y  | Y   | <sup>a</sup> | Y | N  | N            | Y            | Y  | <sup>a</sup> | Y  | 7     | Moderate               | (85)       |
| Li <i>et al</i> , 2015                  | Y             | Y  | Y   | Y            | Y | Y  | N            | Y            | Y  | <sup>a</sup> | Y  | 9     | High                   | (86)       |
| Maldonado-Rodríguez <i>et al</i> , 2022 | Y             | Y  | Y   | Y            | Y | N  | N            | N            | Y  | <sup>a</sup> | Y  | 7     | Moderate               | (3)        |
| Mendizabal-Ruiz <i>et al</i> , 2009     | Y             | Y  | Y   | Y            | Y | N  | N            | N            | Y  | <sup>a</sup> | Y  | 7     | Moderate               | (87)       |
| Mou <i>et al</i> , 2011                 | Y             | Y  | Y   | Y            | Y | Y  | <sup>a</sup> | <sup>a</sup> | Y  | <sup>a</sup> | Y  | 8     | High                   | (18)       |
| Salman <i>et al</i> , 2017              | Y             | Y  | Y   | Y            | Y | N  | Y            | <sup>a</sup> | Y  | <sup>a</sup> | Y  | 8     | High                   | (88)       |
| Sigaroodi <i>et al</i> , 2012           | Y             | Y  | Y   | Y            | Y | Y  | N            | N            | Y  | <sup>a</sup> | Y  | 8     | High                   | (89)       |
| Tawfeik <i>et al</i> , 2020             | Y             | Y  | Y   | Y            | Y | Y  | <sup>a</sup> | <sup>a</sup> | Y  | <sup>a</sup> | Y  | 8     | High                   | (90)       |
| Vernet-Tomas <i>et al</i> , 2015        | Y             | Y  | Y   | N            | Y | Y  | N            | N            | Y  | Y            | Y  | 8     | High                   | (91)       |
| Wang <i>et al</i> , 2014                | Y             | Y  | Y   | Y            | Y | Y  | N            | N            | Y  | <sup>a</sup> | Y  | 8     | High                   | (92)       |

<sup>a</sup>Cannot tell. CASP criteria for case-control studies: i) Did the study address a clearly focused issue?; ii) Did the authors use an appropriate method to answer their question?; iii) Were the cases recruited in an acceptable way?; iv) Were the controls selected in an acceptable way?; v) Was the exposure accurately measured to minimize bias?; vi) (a) Aside from the experimental intervention, were the groups treated equally?; (b) Have the authors taken account of the potential confounding factors in the design and/or in their analysis?; vii) How large was the treatment effect?; viii) How precise was the estimate of the treatment effect?; ix) Do you believe the results?; x) Can the results be applied to the local population?; and xi) Do the results of this study fit with other available evidence? Y, yes; N, no; CASP, Critical Appraisal Skills Program.
