# Supplementary material for: Human papillomaviruses and breast cancer: A systematic review and meta‑analysis
Source: PubMed Central journal article supplement — Oncol Lett. 2023 Dec 22;27(2):75. doi: 10.3892/ol.2023.14208 (PMC10773228; doi:10.3892/ol.2023.14208), 2023-12-22
Supplement: Supplementary_Data3.pdf [file Supplementary_Data3.pdf]

Table SII. Excluded studies and reasons for exclusion.

| First author, year                 | Reason for exclusion                   | PMID/DOI | (Refs.) |
|------------------------------------|----------------------------------------|----------|---------|
| Golrokh-Mofrad <i>et al</i> , 2021 | Co-presence of other oncogenic viruses | 33482849 | (4)     |
| Guo <i>et al</i> , 2021            | HPV DNA detected by non-PCR methods    | 34059433 | (19)    |
| Mostafaei <i>et al</i> , 2020      | Co-presence of other oncogenic viruses | 32458652 | (26)    |
| Oramas <i>et al</i> , 2020         | Case report                            | 33218360 | (27)    |
| Balci <i>et al</i> , 2019          | Absence of healthy/benign controls     | 30785026 | (28)    |
| Baltzell <i>et al</i> , 2018       | Co-presence of other oncogenic viruses | 29266207 | (29)    |
| Kouloura <i>et al</i> , 2018       | Absence of healthy/benign controls     | 29890463 | (30)    |
| Ghaffari <i>et al</i> , 2018       | Absence of healthy/benign controls     | 30124441 | (31)    |
| Wang <i>et al</i> , 2017           | Absence of healthy/benign controls     | 29423411 | (32)    |
| Wang <i>et al</i> , 2017           | Absence of healthy/benign controls     | 29250535 | (33)    |
| Rezaei <i>et al</i> , 2017         | Absence of healthy/benign controls     | 28537481 | (34)    |
| Naushad <i>et al</i> , 2017        | Co-presence of other oncogenic viruses | 28705719 | (35)    |
| Islam <i>et al</i> , 2017          | Prior chemotherapy                     | 28245287 | (36)    |
| Atique <i>et al</i> , 2017         | Prospective study                      | 28495003 | (37)    |
| Tsuboi <i>et al</i> , 2016         | HPV DNA isolation was not studied      | 26476745 | (38)    |
| Søgaard <i>et al</i> , 2016        | Prospective study                      | 27253173 | (39)    |
| Mohtasebi <i>et al</i> , 2016      | Absence of healthy/benign controls     | 27186947 | (40)    |
| Ilahi <i>et al</i> , 2016          | Absence of healthy/benign controls     | 27613186 | (41)    |
| Wang <i>et al</i> , 2016           | HPV DNA detected by non-PCR methods    | 27688086 | (42)    |
| Yan <i>et al</i> , 2016            | Absence of healthy/benign controls     | 27353707 | (43)    |
| El-Shinawi <i>et al</i> , 2015     | Absence of healthy/benign controls     | 26508152 | (44)    |
| Fimereli <i>et al</i> , 2015       | Absence of healthy/benign controls     | 25884932 | (45)    |
| Ali <i>et al</i> , 2014            | HPV DNA detected by non-PCR methods    | 24960513 | (46)    |
| Piana <i>et al</i> , 2014          | Absence of healthy/benign controls     | 25413873 | (47)    |
| Ohba <i>et al</i> , 2014           | Absence of healthy/benign controls     | 24858917 | (48)    |
| Corbex <i>et al</i> , 2014         | Absence of healthy/benign controls     | 25478862 | (14)    |
| Liang <i>et al</i> , 2013          | HPV DNA detected by non-PCR methods    | 23959946 | (50)    |

|                                      |                                          |                           |      |
|--------------------------------------|------------------------------------------|---------------------------|------|
| Herrera-Goepfert <i>et al</i> , 2013 | Absence of healthy/benign controls       | 24083491                  | (51) |
| Pereira Suarez <i>et al</i> , 2013   | Absence of healthy/benign controls       | 23637866                  | (52) |
| Hossein <i>et al</i> , 2013          | Absence of healthy/benign controls       | 24328743                  | (53) |
| Herrera-Romano <i>et al</i> , 2012   | Absence of healthy/benign controls       | 21909942                  | (54) |
| Hansen <i>et al</i> , 2012           | Prior precancerous lesions               | 23011481                  | (55) |
| Glenn <i>et al</i> , 2012            | Co-presence of other oncogenic viruses   | 23183846                  | (56) |
| Baltzell <i>et al</i> , 2012         | Absence of healthy/benign controls       | 21823105                  | (57) |
| Hedauet <i>et al</i> , 2011          | Absence of healthy/benign controls       | 21247504                  | (58) |
| Herrera-Goepfert <i>et al</i> , 2011 | Absence of healthy/benign controls       | 21146410                  | (99) |
| Khammapirad <i>et al</i> , 2011      | Case report                              | 23569749                  | (59) |
| Silva and da Silva, 2011             | Absence of healthy/benign controls       | 20734131                  | (9)  |
| Cazzaniga <i>et al</i> , 2009        | HPV DNA isolated not from breast tissues | 18465220                  | (60) |
| Fan <i>et al</i> , 2008              | HPV DNA detected by non-PCR methods      | 10.1007/s12250-008-2914-2 | (61) |
| Akil <i>et al</i> , 2008             | Absence of healthy/benign controls       | 18648363                  | (62) |
| Liang and Tian, 2008                 | Medical hypothesis                       | 17656036                  | (63) |
| Duò <i>et al</i> , 2008              | Absence of healthy/benign controls       | 21479468                  | (64) |
| de Cremoux <i>et al</i> , 2008       | Absence of healthy/benign controls       | 17624590                  | (65) |
| Choi <i>et al</i> , 2007             | Absence of healthy/benign controls       | 18391549                  | (66) |
| Yasmeen <i>et al</i> , 2007          | Animal study                             | 18156804                  | (67) |
| Yasmeen <i>et al</i> , 2007          | Animal study                             | 17721085                  | (68) |
| Lindel <i>et al</i> , 2006           | Absence of healthy/benign controls       | 17088061                  | (69) |
| Kroupis <i>et al</i> , 2006          | Absence of healthy/benign controls       | 16780823                  | (70) |
| Tsai <i>et al</i> , 2005             | Co-presence of other oncogenic viruses   | 15602723                  | (71) |
| de Villiers <i>et al</i> , 2005      | Absence of healthy/benign controls       | 15642157                  | (72) |
| Widschwendter <i>et al</i> , 2004    | Prior neoplasia                          | 15494272                  | (73) |

---

HPV, human papillomavirus.
