# Supplementary material for: Human papillomaviruses and breast cancer: A systematic review and meta‑analysis
Source: PubMed Central journal article supplement — Oncol Lett. 2023 Dec 22;27(2):75. doi: 10.3892/ol.2023.14208 (PMC10773228; doi:10.3892/ol.2023.14208), 2023-12-22
Supplement: Supplementary_Data4.pdf [file Supplementary_Data4.pdf]

Table SIII. Tool to assess risk of biases in case control studies.

| First author, year                      | Questions |    |     |    |    | Bias     | (Refs.) |
|-----------------------------------------|-----------|----|-----|----|----|----------|---------|
|                                         | i         | ii | iii | iv | v  |          |         |
| Afshar <i>et al</i> , 2018              | DN        | DY | PY  | DY | PN | Moderate | (74)    |
| Ahangar-Oskouee <i>et al</i> , 2014     | DN        | DY | PY  | DY | DN | Moderate | (75)    |
| Alinezhadi <i>et al</i> , 2022          | DN        | DY | DY  | DY | DN | Moderate | (7)     |
| Antonsson <i>et al</i> , 2011           | DN        | DY | DY  | DY | DN | Moderate | (76)    |
| Bakhtiyarizadeh <i>et al</i> , 2017     | DN        | DN | DY  | DY | DN | Serious  | (77)    |
| Cavalcante <i>et al</i> , 2018          | DN        | DY | DY  | DY | DN | Moderate | (78)    |
| Chang <i>et al</i> , 2012               | DN        | DY | DY  | DY | PY | Low      | (79)    |
| Damin <i>et al</i> , 2004               | PY        | DY | DY  | DY | DN | Low      | (80)    |
| de León <i>et al</i> , 2009             | DN        | DY | DY  | DY | DN | Moderate | (81)    |
| Delgado-García <i>et al</i> , 2017      | DY        | DY | DY  | DY | PN | Low      | (21)    |
| Doosti <i>et al</i> , 2016              | DN        | DY | DY  | PY | DN | Moderate | (82)    |
| ElAmrani <i>et al</i> , 2018            | DN        | DY | DY  | DY | PY | Low      | (83)    |
| Fu <i>et al</i> , 2015                  | DN        | DY | DY  | DY | PN | Moderate | (84)    |
| Gannon <i>et al</i> , 2015              | DN        | DY | DY  | DY | DN | Moderate | (85)    |
| Li <i>et al</i> , 2015                  | DN        | DY | DY  | DY | DN | Moderate | (86)    |
| Maldonado-Rodríguez <i>et al</i> , 2022 | DN        | DY | DY  | DY | DN | Moderate | (3)     |
| Mendizabal-Ruiz <i>et al</i> , 2009     | DN        | DY | DY  | PY | DN | Moderate | (87)    |
| Mou <i>et al</i> , 2011                 | PY        | DY | DY  | DY | PN | Low      | (18)    |
| Salman <i>et al</i> , 2017              | DN        | DY | DY  | DY | DN | Low      | (88)    |
| Sigaroodi <i>et al</i> , 2012           | DN        | DY | DY  | DY | PY | Low      | (89)    |
| Tawfeik <i>et al</i> , 2020             | DN        | DY | DY  | DY | DN | Moderate | (90)    |

|                                  |    |    |    |    |    |          |      |
|----------------------------------|----|----|----|----|----|----------|------|
| Vernet-Tomas <i>et al</i> , 2015 | DN | DY | DY | DY | DN | Moderate | (91) |
| Wang <i>et al</i> , 2014         | DN | DY | DY | DY | PN | Moderate | (92) |

---

Questions: i) Can we be confident in the assessment of exposure?; ii) Can we be confident that cases had developed the outcome of interest and controls had not?; iii) Were the cases (those who were exposed and developed the outcome of interest) properly selected?; iv) Were the controls (those who were exposed and did not develop the outcome of interest) properly selected?; and v) Were cases and controls matched according to important prognostic variables or was statistical adjustment carried out for those variables? DY, definitely yes; PY, probably yes; PN, probably no; DN, definitely no.
