# Supplementary material for: Human papillomaviruses and breast cancer: A systematic review and meta‑analysis
Source: PubMed Central journal article supplement — Oncol Lett. 2023 Dec 22;27(2):75. doi: 10.3892/ol.2023.14208 (PMC10773228; doi:10.3892/ol.2023.14208), 2023-12-22
Supplement: Supplementary_Data6.pdf [file Supplementary_Data6.pdf]

Table SV. Summary of findings and risk of bias.

| First author(s), year                   | Sample size | HPV DNA positive    |             | OR (95% CI)         | P<0.05 | Weight (random), % | Risk of bias | (Refs.) |
|-----------------------------------------|-------------|---------------------|-------------|---------------------|--------|--------------------|--------------|---------|
|                                         |             | Patients with BC, % | Controls, % |                     |        |                    |              |         |
| Afshar <i>et al</i> , 2018              | 138         | 8.16                | 0.00        | 7.61 (0.43-135.00)  | 0.17   | 3.10               | Moderate     | (74)    |
| Ahangar-Oskouee <i>et al</i> , 2014     | 130         | 32.81               | 0.00        | 63.29(3.74-1072.07) | 0.00   | 3.20               | Moderate     | (75)    |
| Alinezhadi <i>et al</i> , 2022          | 95          | 12.69               | 28.12       | 0.37 (0.13-1.08)    | 0.07   | 7.50               | Moderate     | (7)     |
| Antonsson <i>et al</i> , 2011           | 58          | 50.00               | 25.00       | 3.00(0.29-30.69)    | 0.35   | 4.10               | Moderate     | (76)    |
| Bakhtiyarizadeh <i>et al</i> , 2017     | 300         | 0.00                | 0.00        | 1.00 (0.02-50.73)   | 1.00   | 1.90               | Serious      | (77)    |
| Cavalcante <i>et al</i> , 2018          | 198         | 55.34               | 15.79       | 6.61 (3.37-12.97)   | 0.00   | 8.70               | Moderate     | (78)    |
| Chang <i>et al</i> , 2012               | 78          | 0.00                | 0.00        | 0.63 (0.01-32.53)   | 0.82   | 1.90               | Low          | (79)    |
| Damin <i>et al</i> , 2004               | 142         | 25.74               | 0.00        | 27.67 (1.64-466.13) | 0.02   | 3.20               | Low          | (80)    |
| de León <i>et al</i> , 2009             | 94          | 29.41               | 0.00        | 36.95 (2.14-638.9)  | 0.01   | 3.10               | Moderate     | (81)    |
| Delgado-García <i>et al</i> , 2017      | 437         | 51.80               | 26.30       | 3.00(1.99-4.52)     | 0.00   | 9.40               | Low          | (21)    |
| Doosti <i>et al</i> , 2016              | 171         | 22.99               | 0.00        | 51.33 (3.05-864.19) | 0.01   | 3.20               | Moderate     | (82)    |
| ElAmrani <i>et al</i> , 2018            | 88          | 25.00               | 8.33        | 3.67 (0.44-30.30)   | 0.23   | 4.50               | Low          | (83)    |
| Fu <i>et al</i> , 2015                  | 252         | 14.79               | 1.20        | 14.20(1.89-107.00)  | 0.01   | 4.70               | Moderate     | (84)    |
| Gannon <i>et al</i> , 2015              | 90          | 16.25               | 10.00       | 1.75 (0.20-14.99)   | 0.61   | 4.40               | Moderate     | (85)    |
| Li <i>et al</i> , 2015                  | 279         | 1.60                | 0.00        | 3.51 (0.18-68.66)   | 0.41   | 3.00               | Moderate     | (86)    |
| Maldonado-Rodríguez <i>et al</i> , 2022 | 116         | 20.34               | 33.33       | 0.51 (0.22-1.18)    | 0.12   | 8.30               | Moderate     | (3)     |
| Mendizabal-Ruiz <i>et al</i> , 2009     | 107         | 4.48                | 0.00        | 4.40(0.22-87.33)    | 0.33   | 2.90               | Moderate     | (87)    |
| Mou <i>et al</i> , 2011                 | 108         | 6.45                | 0.00        | 7.15 (0.38-136.27)  | 0.19   | 3.00               | Low          | (18)    |
| Salman <i>et al</i> , 2017              | 110         | 47.30               | 30.56       | 2.04 (0.88-4.74)    | 0.10   | 8.20               | Low          | (88)    |
| Sigaroodi <i>et al</i> , 2012           | 130         | 18.99               | 1.96        | 11.72 (1.50-91.74)  | 0.02   | 4.60               | Low          | (89)    |
| Tawfeik <i>et al</i> , 2020             | 35          | 20.00               | 0.00        | 8.46 (0.42-170.30)  | 0.16   | 2.90               | Moderate     | (90)    |
| Vernet-Tomas <i>et al</i> , 2015        | 78          | 0.00                | 0.00        | 0.03 (0.00-2.01)    | 0.10   | 1.80               | Moderate     | (91)    |
| Wang <i>et al</i> , 2014                | 9           | 14.29               | 50.00       | 0.17 (0.01-5.45)    | 0.31   | 2.30               | Moderate     | (92)    |
| Total (random effects)                  | 3243        | 21.95               | 8.96        | 3.83 (2.03-7.26)    | <0.001 | 100.00             | Moderate     | N/A     |

HPV, human papillomavirus; DNA, deoxyribonucleic acid; BC, breast cancer; OR, odds ratio; CI, confidence interval; N/A, not applicable.

One-tailed Fisher's exact probability test for 2x2 contingency tables has been used for every study included in the meta-analysis to determine the P-value of each study.
